# Supplementary material for: Critical Role of Cathepsin L/V in Regulating Endothelial Cell Senescence
Source: MDPI journal article supplement (doi:10.3390/biology12010042), 2022-12-26
Supplement: s1 [file s1]

## Supplementary Materials

**Table S1.** Primer sequences for qRT-PCR.

| <b>Gene name</b> | <b>Forward primer(5'-3')</b> | <b>Reverse primer(5'-3')</b> |
|------------------|------------------------------|------------------------------|
| Cathepsin V      | TGGAAGGCAACACACAGAAG         | GAAGCCATGTTTCCCTTGG          |
| p53              | GGCCCACTTCACCGTACTAA         | GTGGTTTCAAGGCCAGATGT         |
| p16              | GACATCCCCGATTGAAAGAA         | TTTACGGTAGTGGGGGAAGG         |
| p21              | GACACCACTGGAGGGTGACT         | CAGGTCCACATGGTCTTCCT         |
| ALDH1A2          | GGATGACCATTTCCTGTAGATGGAGA   | GCTATTGCTGCCCCAGCCGTTG       |
| THBD             | GGAGCAGCAGTGCGAAGT           | GTGGCTGGGAAGTGGAAGT          |
| IGFBP5           | TGAGATGAGACAGGAGTCTGAG       | GTCACAATTGGGCAGGTACA         |
| APOLD1           | AGCCAAGCAGAACACAGTCCAAG      | CACTCCAGCCACAGCACTCATTC      |
| NOS3             | TCTCCGCCTCGCTCATG            | AGCCATACAGGATTGTCGCC         |
| LAMA5            | CGAGGACCTTTACTGCAAGC         | GGTGACGTTGACCTCGTTGT         |
| SEMA3F           | CGCGAGCCCCTCATTATACA         | TGACGAAGTTCCCACACTCG         |
| SLC9A3R2         | GACCAGGAGACAGATGAGGAG        | ACTGACATCCTTCTTGCCAG         |
| IL-1 $\beta$     | ACAGATGAAGTGCTCCTTCCA        | GTCGGAGATTTCGTAGCTGGAT       |
| IL-6             | GCAGAAAACAACCTGAACCTT        | ACCTCAAACCTCCAAAAGACCA       |
| ICAM-1           | AGCGGCTGACGTGTGCAGTAAT       | TCTGAGACCTCTGGCTTCGTCA       |
| $\beta$ -actin   | TGGACTTCGAGCAAGAGATG         | TGTTGGCGTACAGGTCTTTG         |

**A**

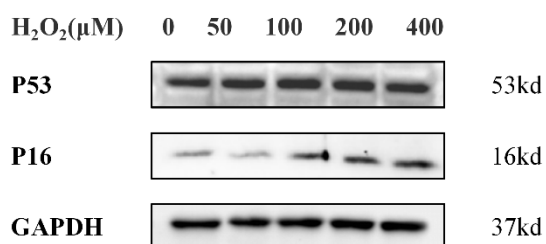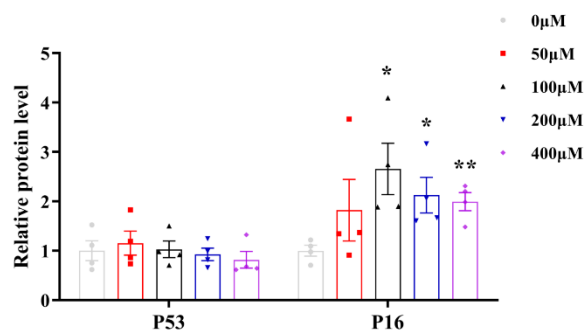

**B**

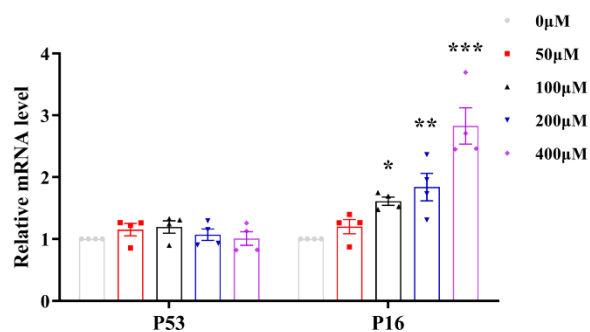

**C**

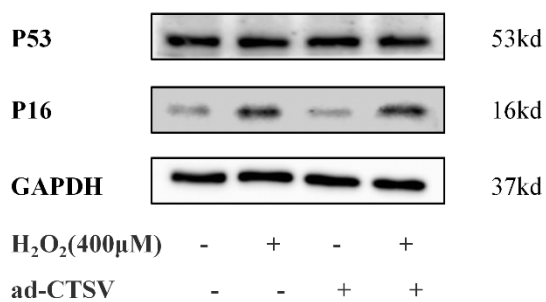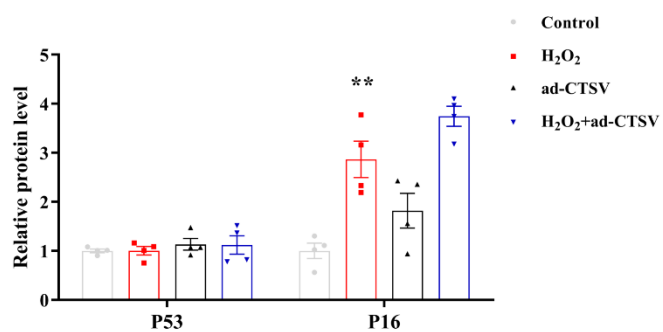

**D**

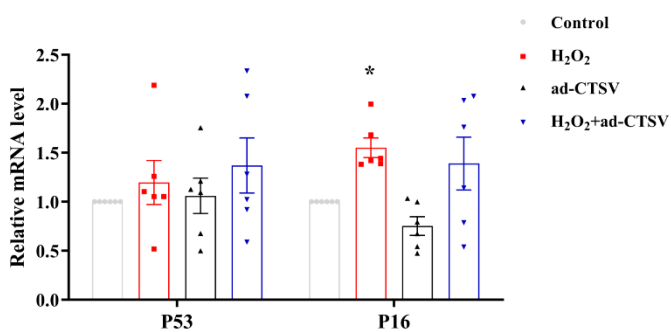

**E**

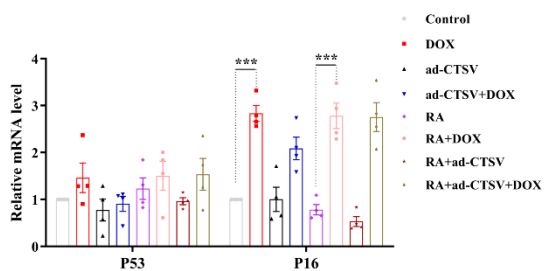

**F**

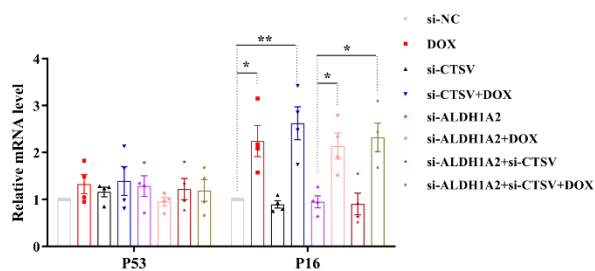

**Figure S1.** Expression of P53 and P16 in HUVECs treated with H<sub>2</sub>O<sub>2</sub>. **A.** HUVECs were treated with different dose of H<sub>2</sub>O<sub>2</sub> (0μM, 50μM, 100μM, 200μM, and 400μM) for 24 h, expression of P53 and P16 were tested by western blot (*n* = 4). **B.** Relative mRNA level of P53 and P16 in H<sub>2</sub>O<sub>2</sub>-treated HUVECs (*n* = 4). **C.** HUVECs were treated with ad-negative control (NC) or ad-CTSV (MOI = 10) for 8 h, and simulated with 400 μM H<sub>2</sub>O<sub>2</sub> for 24 h after incubated in complete growth medium for 40 hours, expression of P53 and P16 were tested by western blot (*n* = 4). **D.** Relative mRNA level of P53 and P16 in HUVECs treated with H<sub>2</sub>O<sub>2</sub> and ad-CTSV (*n* = 6). **E.** Relative mRNA level of P53 and P16 in HUVECs treated with DOX, ad-CTSV and RA (*n* = 4). **F.** Relative mRNA level of P53 and P16 in HUVECs treated with DOX, si-CTSV and si-ALDH1A2 (*n* = 4). Data were presented as mean ± SEM. One-way ANOVA test was used. \* *p* < 0.05 vs. Control, \*\* *p* < 0.01 vs. Control, \*\*\* *p* < 0.001 vs. Control.

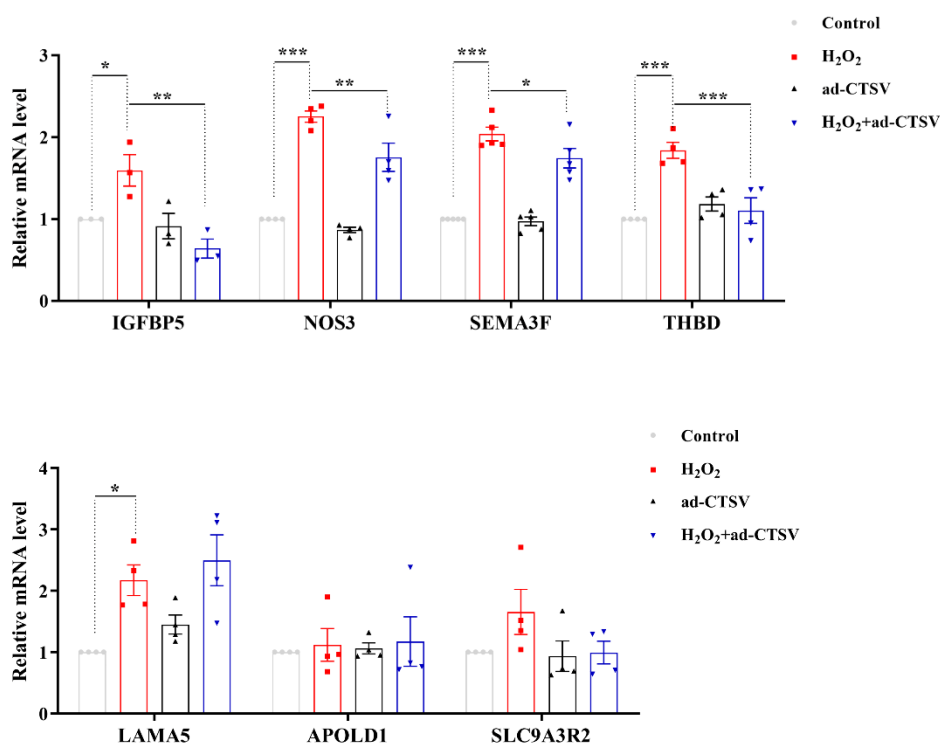

**Figure S2.** Relative mRNA level of the differentially expressed genes. HUVECs were treated with ad-negative control (NC) or ad-CTSV (MOI = 10) for 8 h, and simulated with 400 μM H<sub>2</sub>O<sub>2</sub> for 24 h after incubated in complete growth medium for 40 h. Relative mRNA level of *IGFBP5*, *NOS3*, *THBD*, *SEMA3F*, *LAMA5*, *APOLD1*, and *SLC9A3R2* were presented (*n* = 3–5). Data were presented as mean ± SEM. One-way ANOVA test was used. \* *p* < 0.05, \*\* *p* < 0.01, \*\*\* *p* < 0.001.

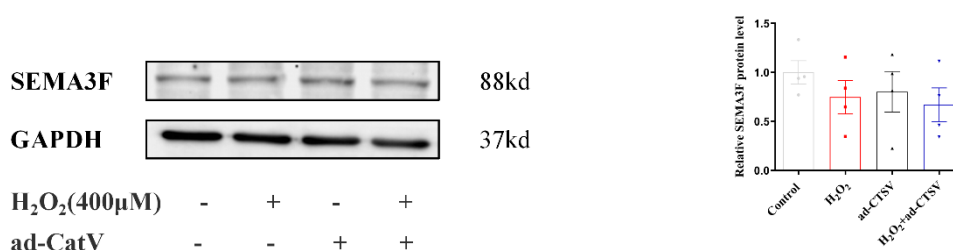

**Figure S3.** Protein level of SEMA3F. HUVECs were treated with ad-negative control (NC) or ad-CTSV (MOI = 10) for 8 h, and simulated with 400 μM H<sub>2</sub>O<sub>2</sub> for 24 h after incubated in complete growth medium for 40 hours. Western blot of SEMA3F was presented (*n* = 4). Data were presented as mean ± SEM. One-way ANOVA test was used.

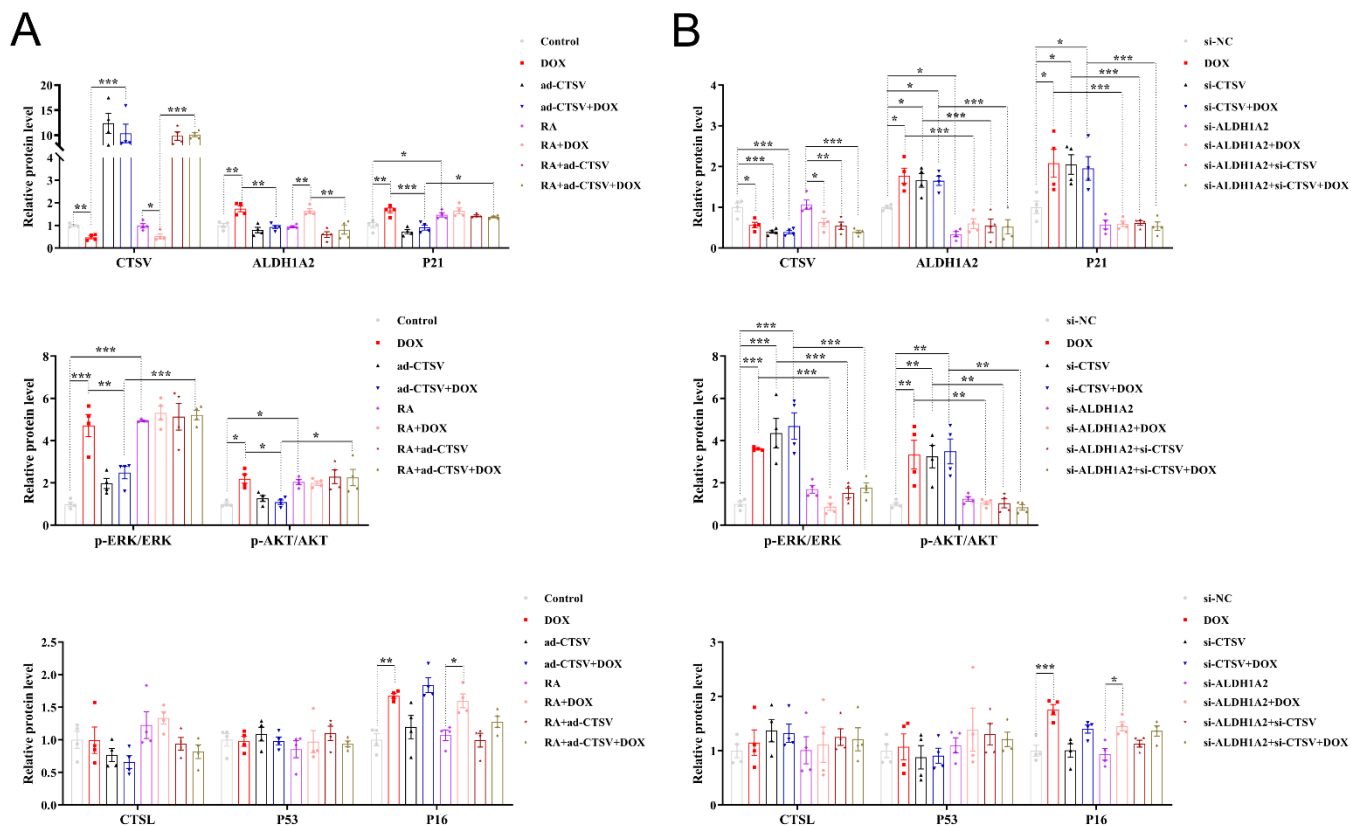

**Figure S4.** Quantification of Western Blots. **A.** Quantification of Figure 6E. **B.** Quantification of Figure 7E. Data were presented as mean  $\pm$  SEM. One-way ANOVA test was used. \*  $p < 0.05$ , \*\*  $p < 0.01$ , \*\*\*  $p < 0.001$ .
