# Supplementary figures and images for: Critical Role of Cathepsin L/V in Regulating Endothelial Cell Senescence
Source: MDPI journal article supplement (doi:10.3390/biology12010042), 2022-12-26

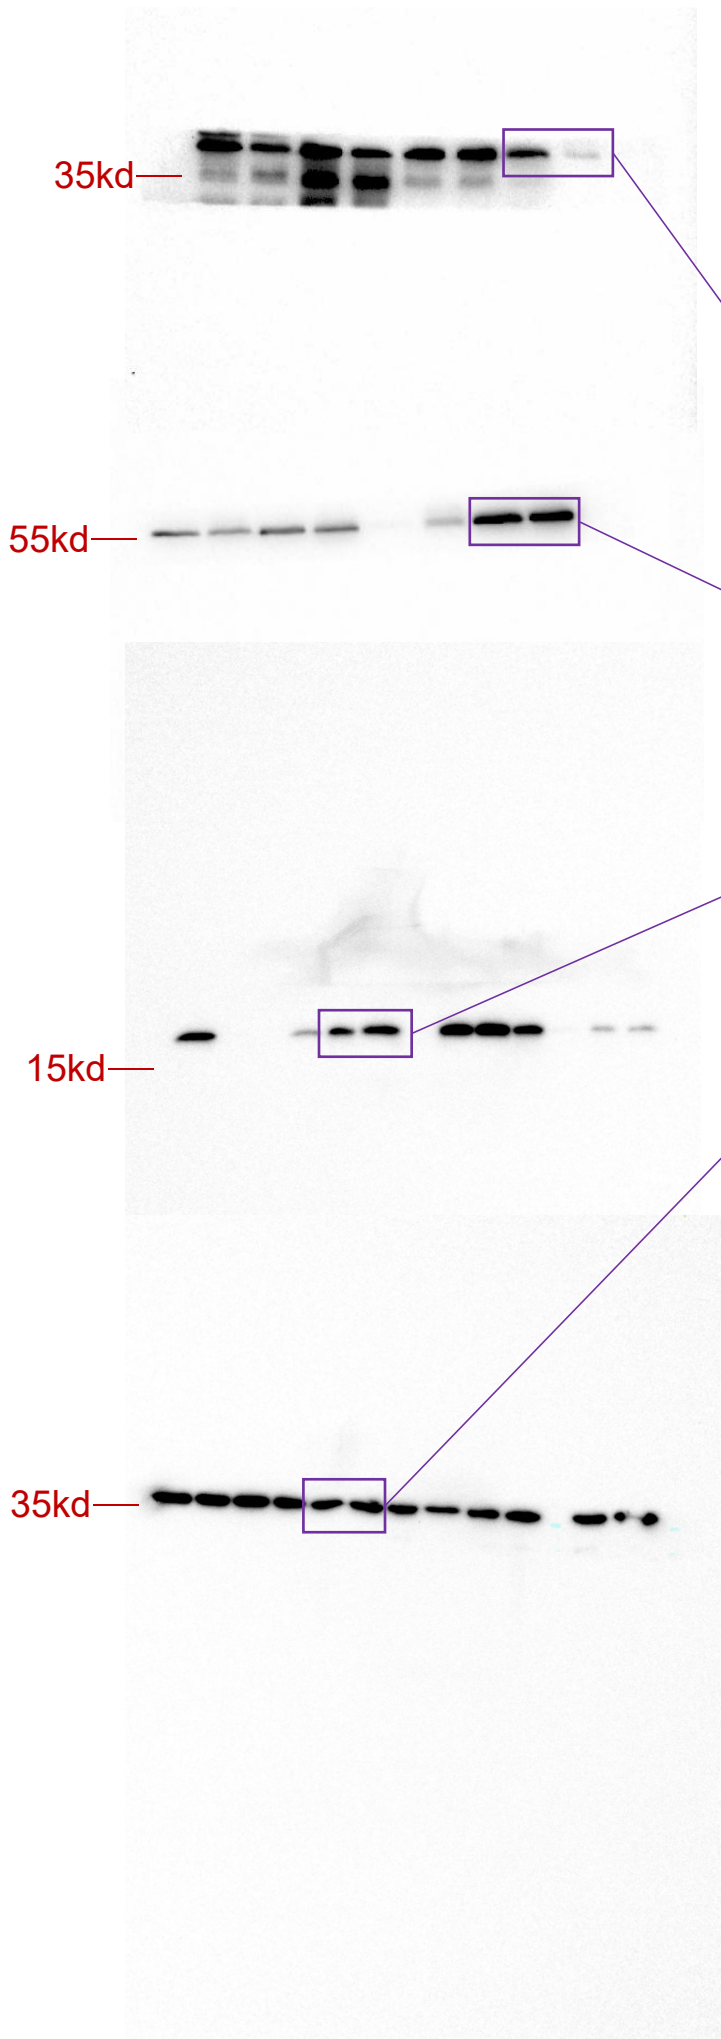

**Figure 1**

**E**

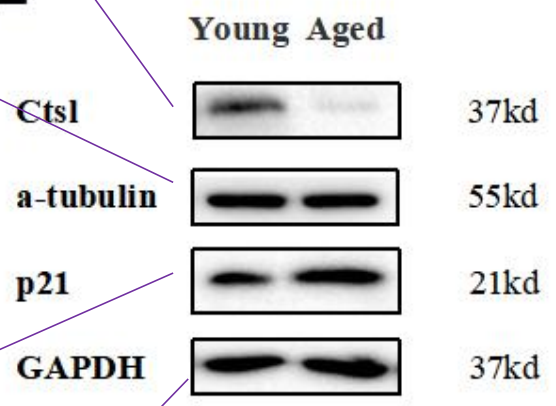

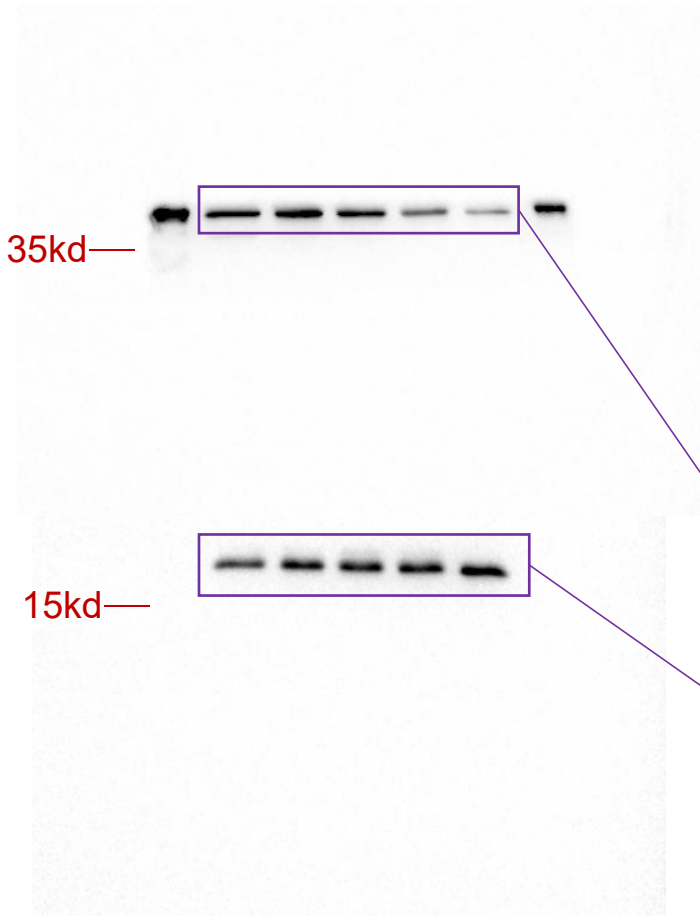

**Figure 2**

**B**

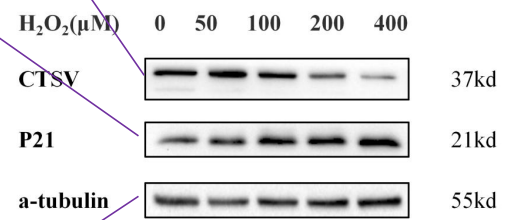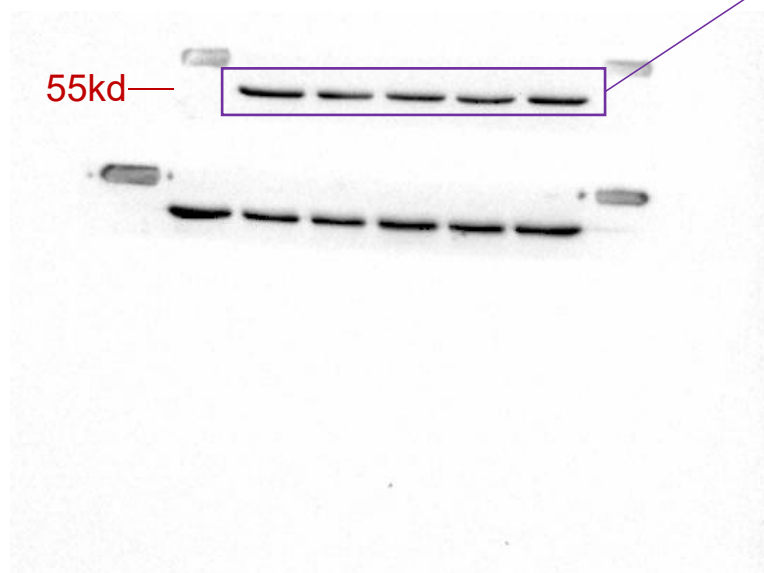

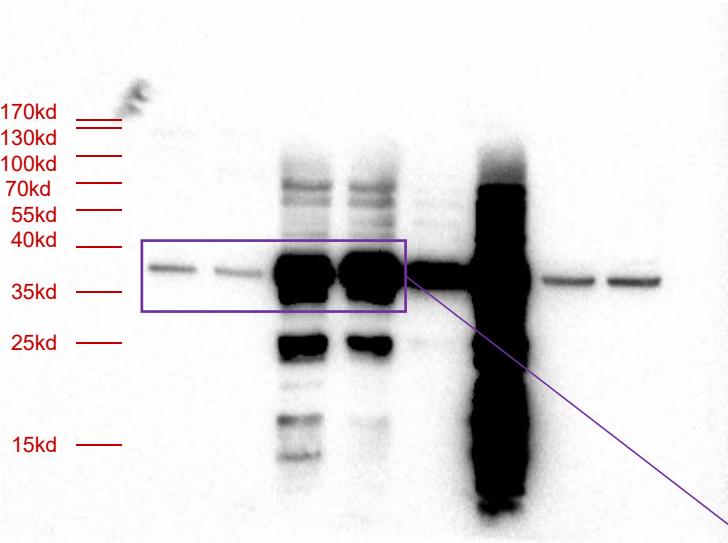

Figure 3

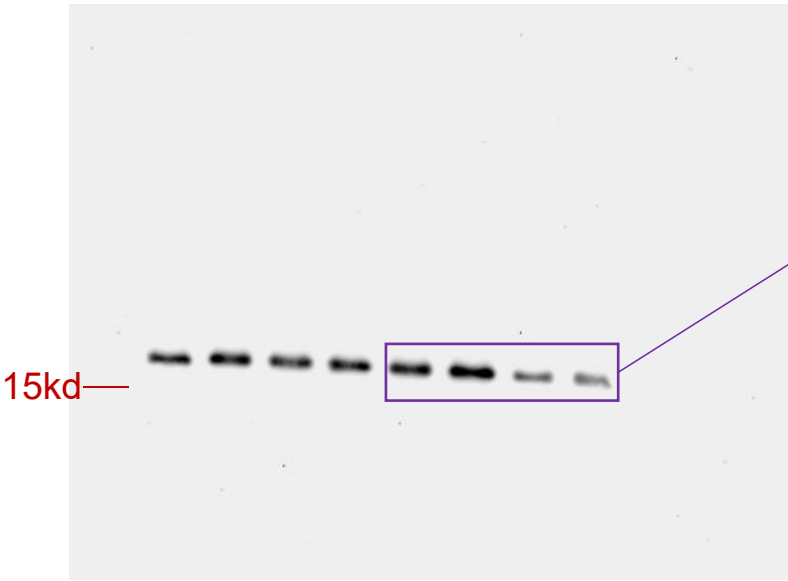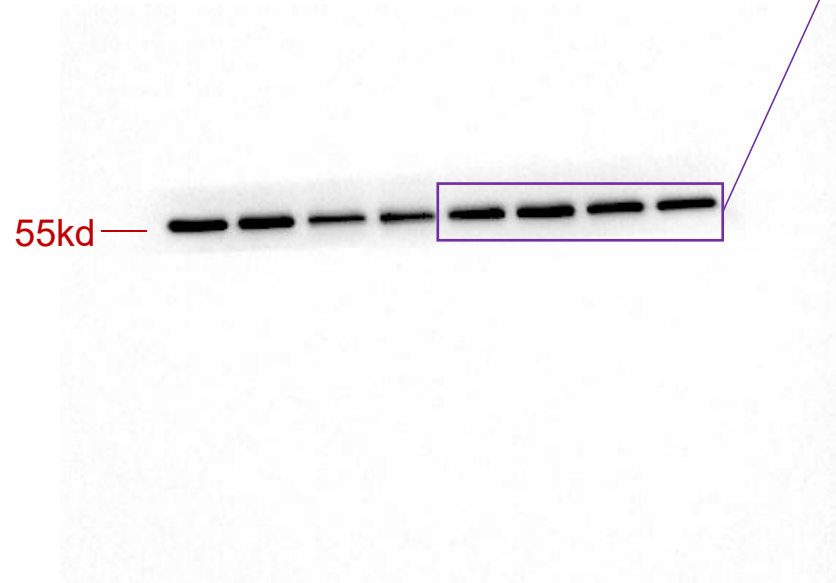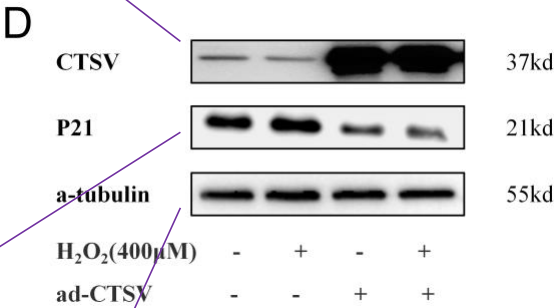

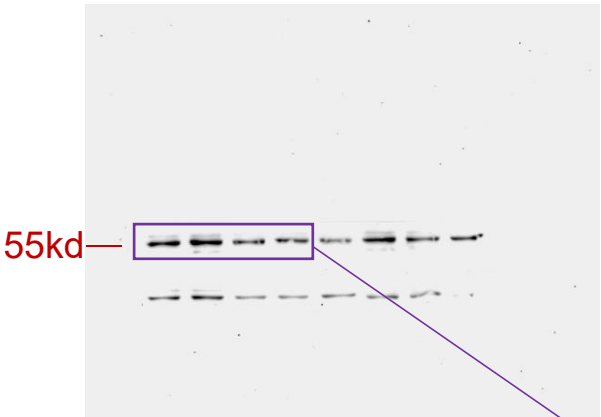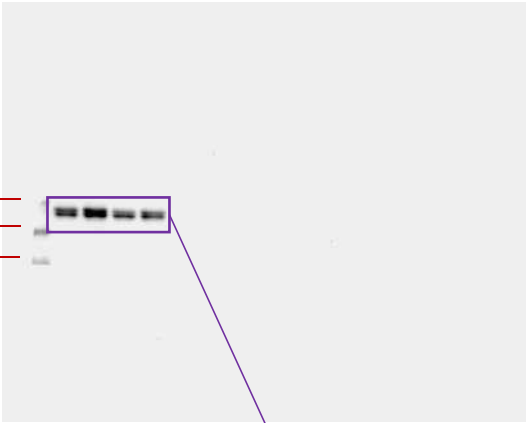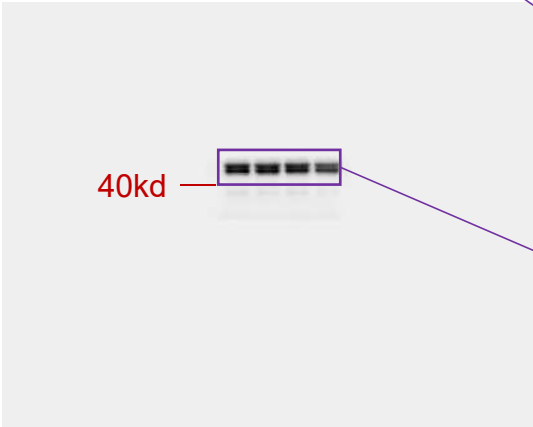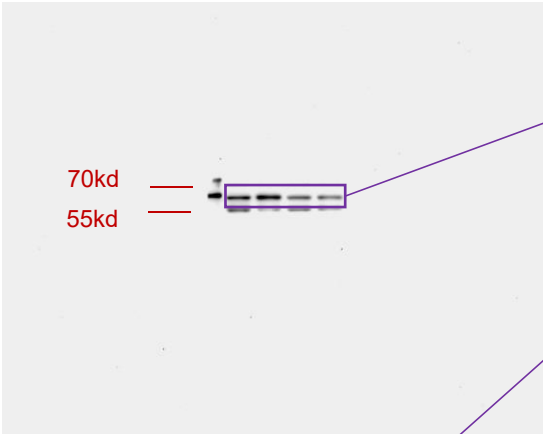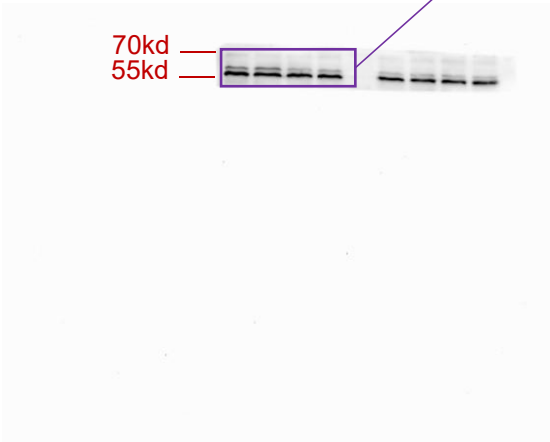

D

Figure 4

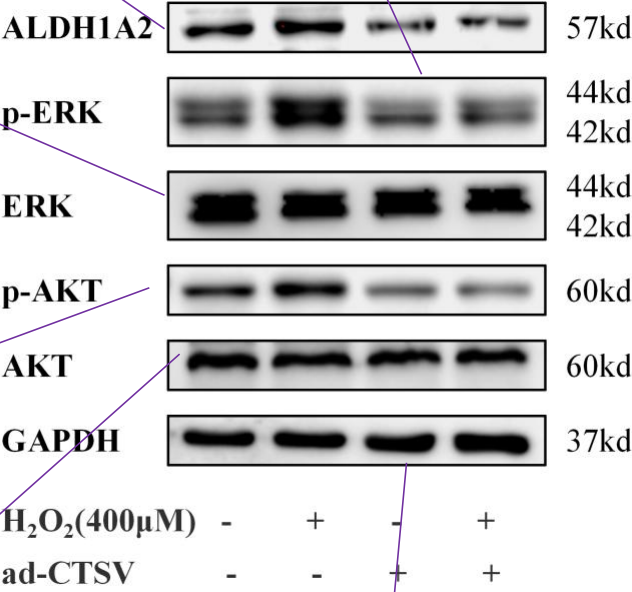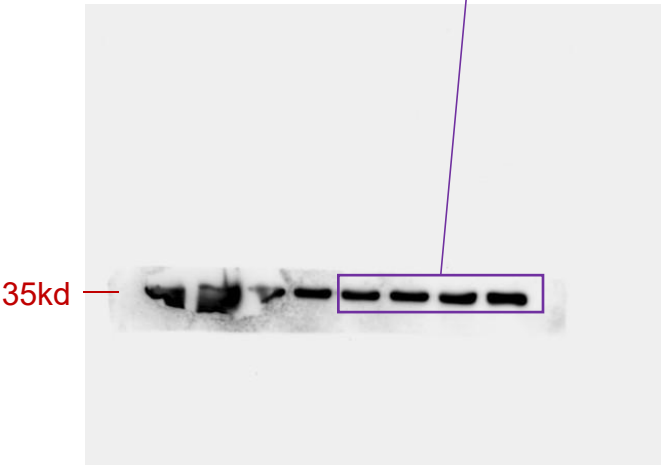

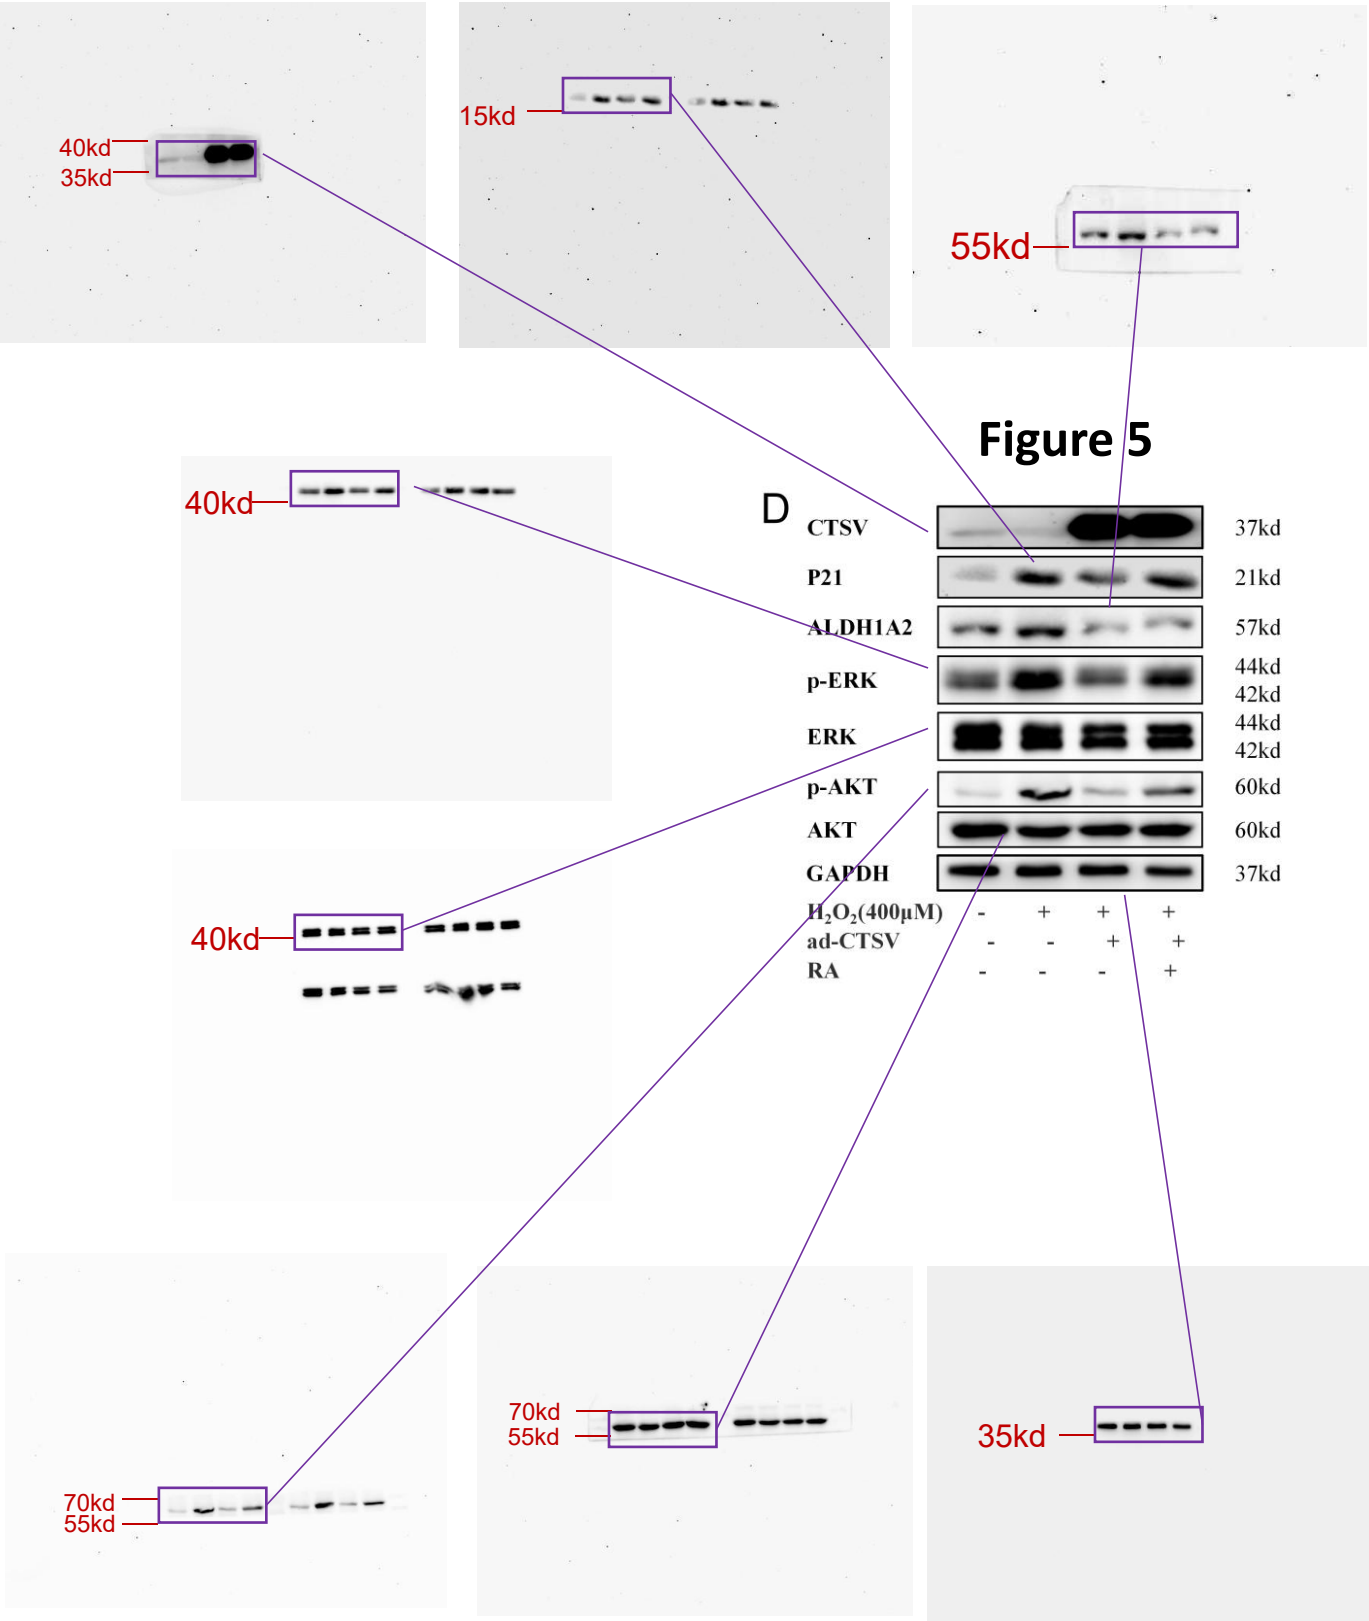

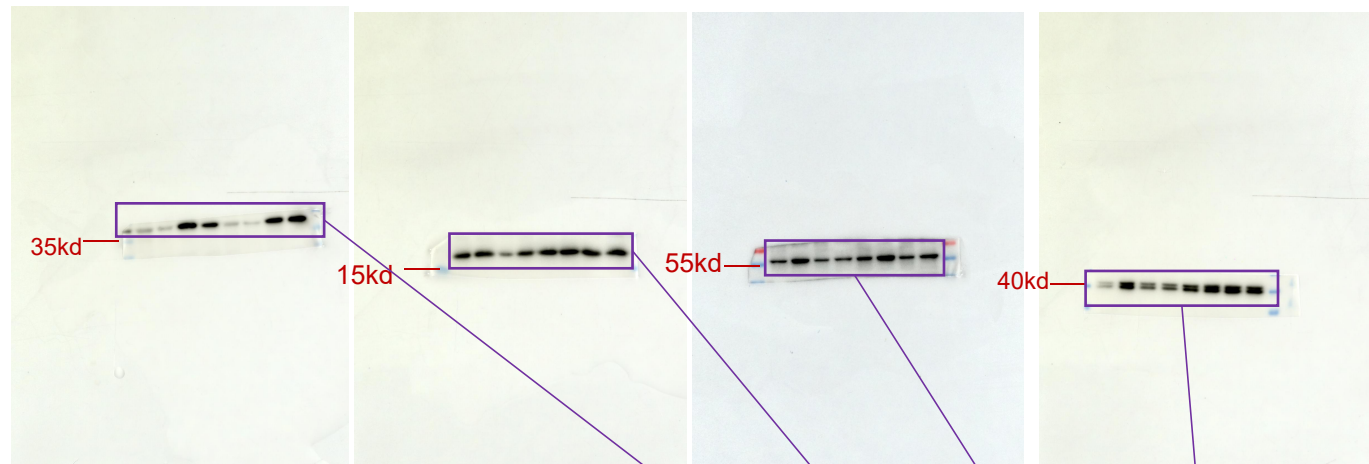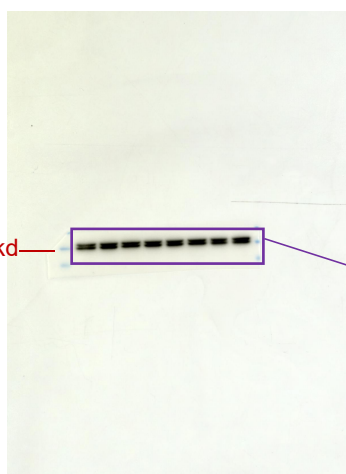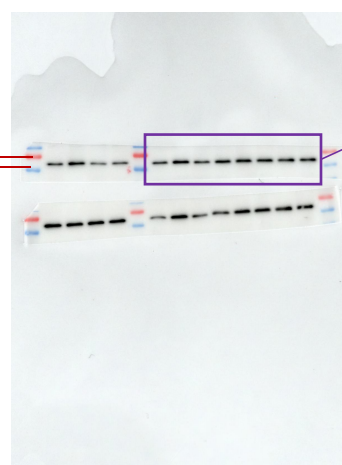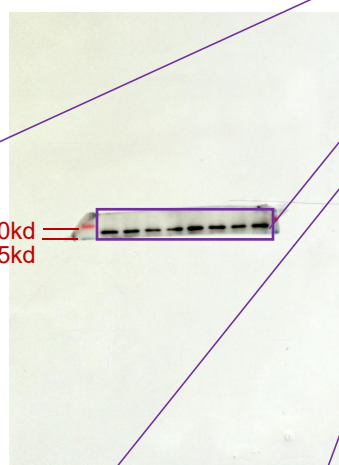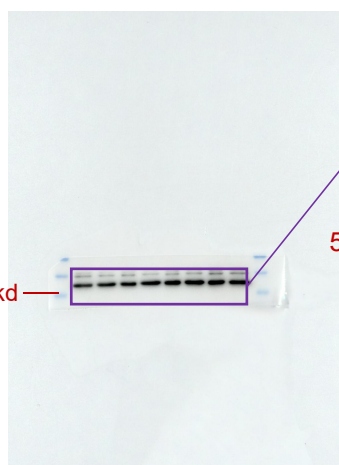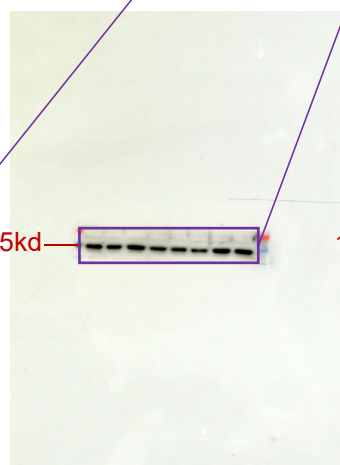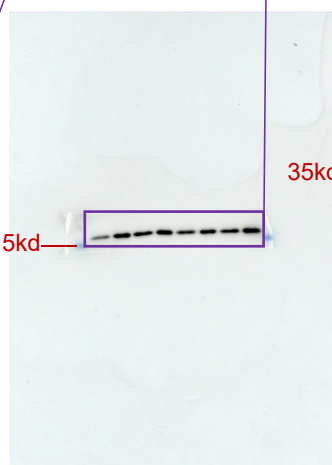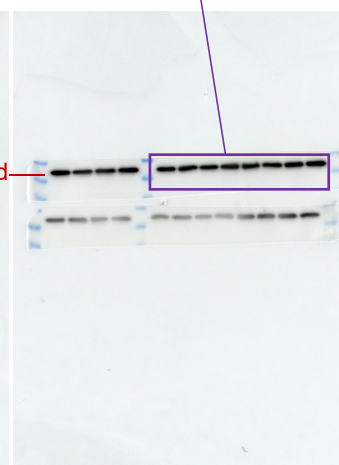

**Figure 6**

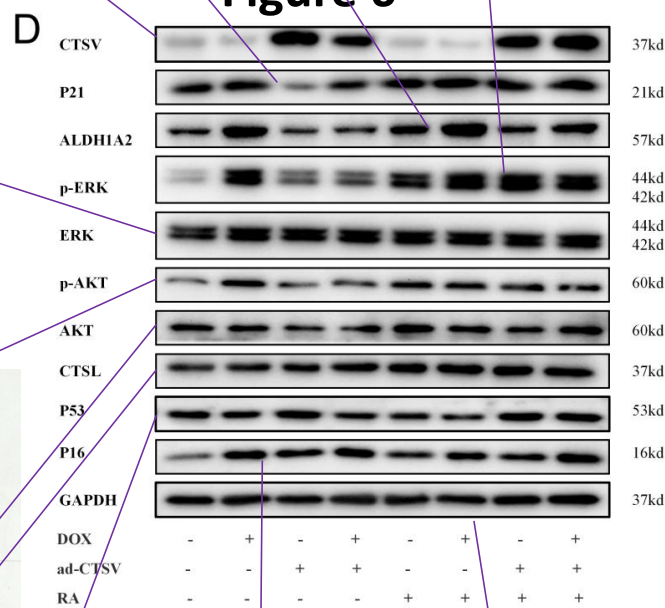



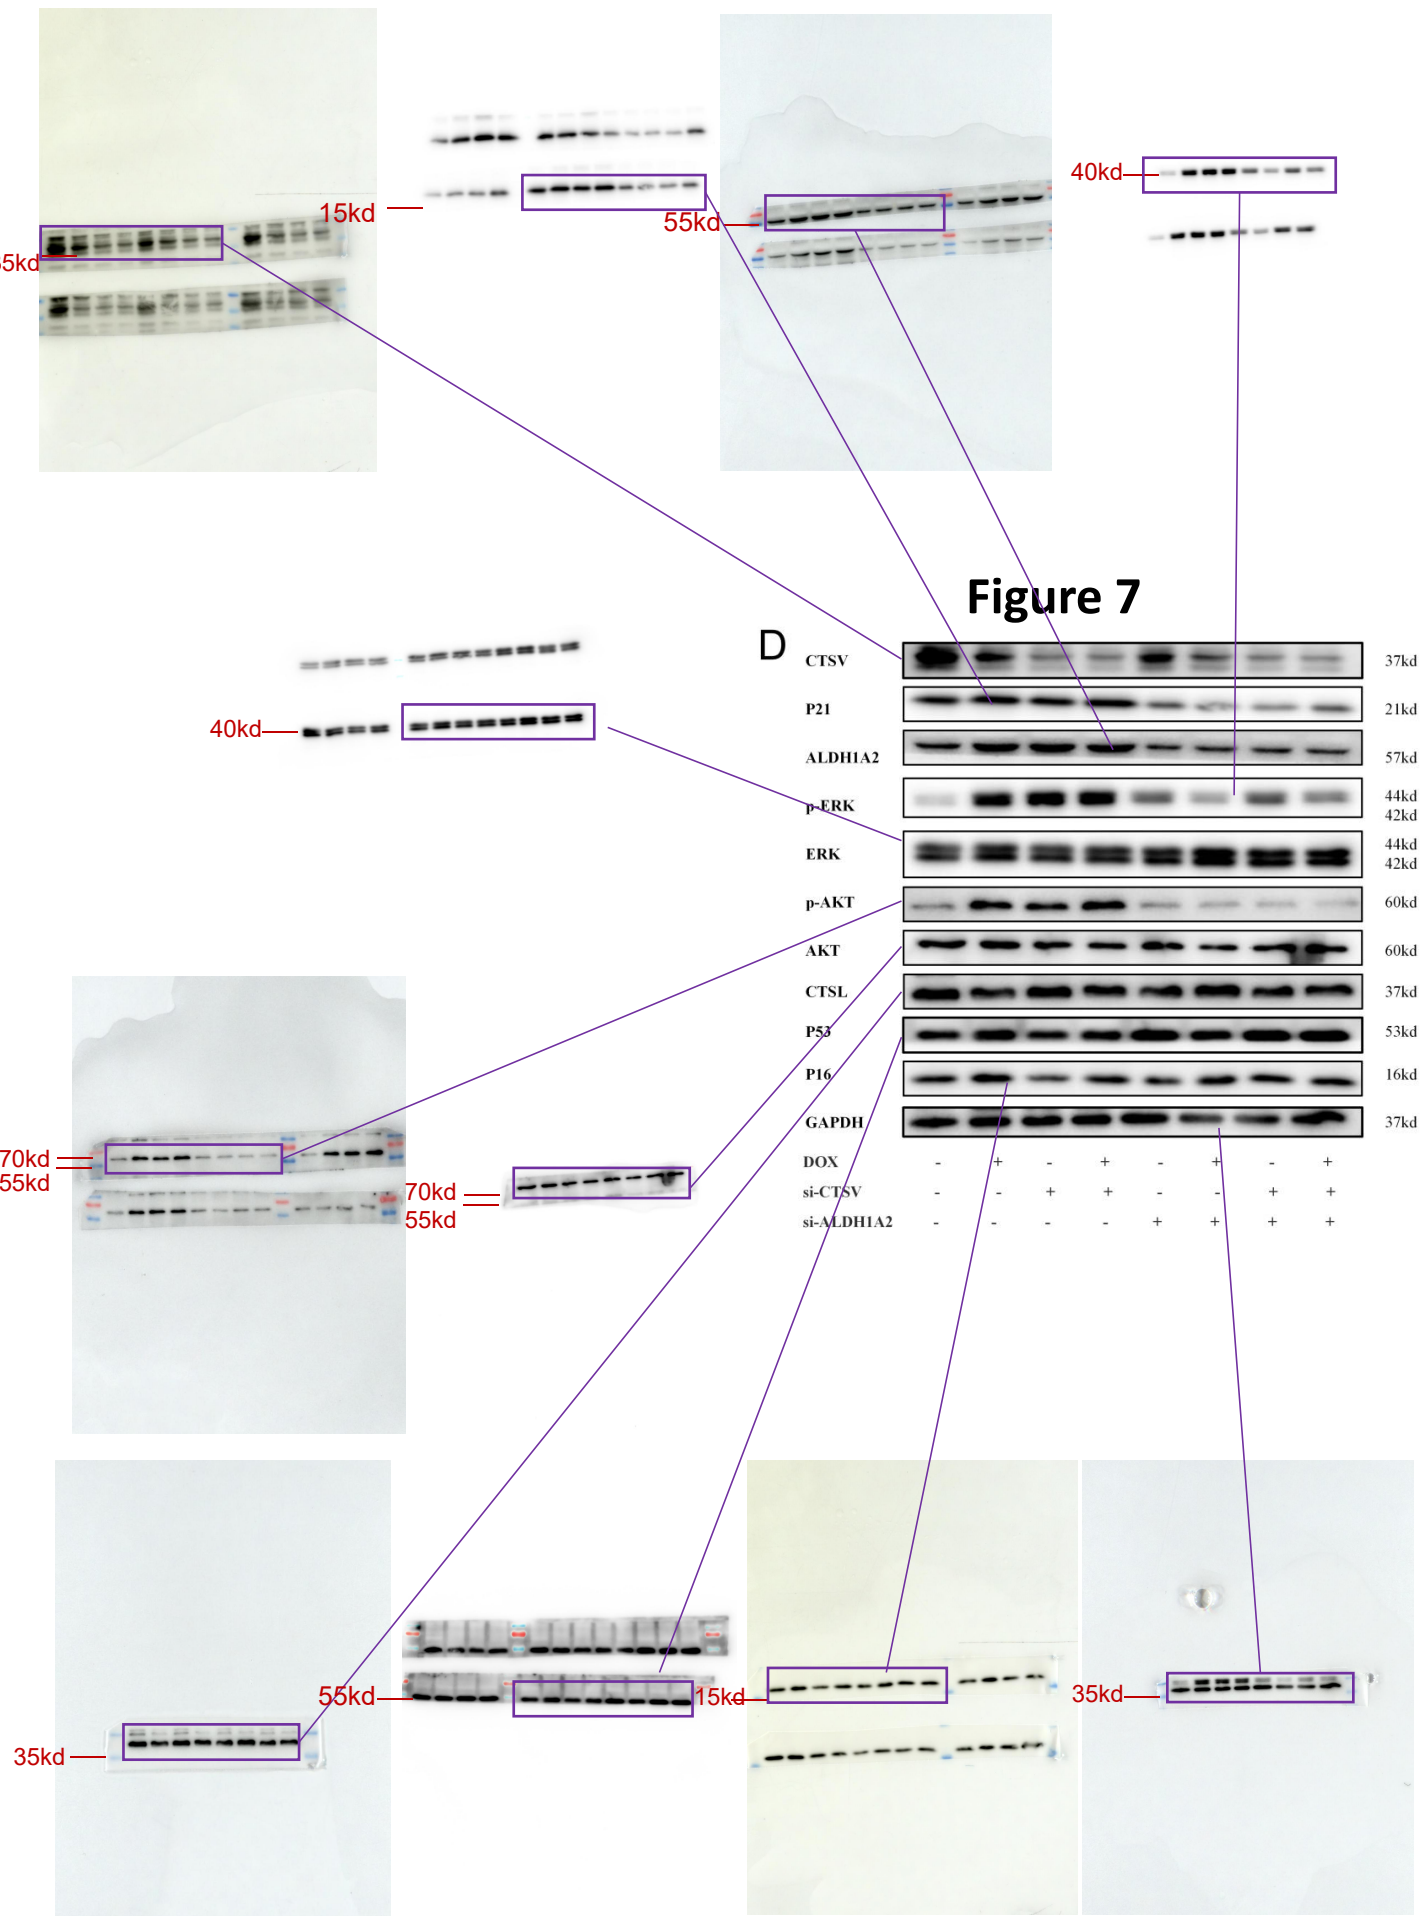

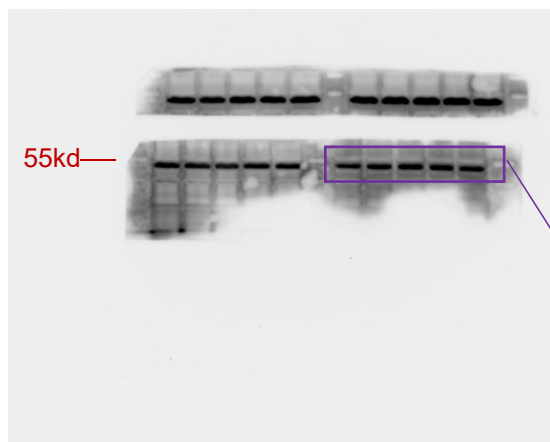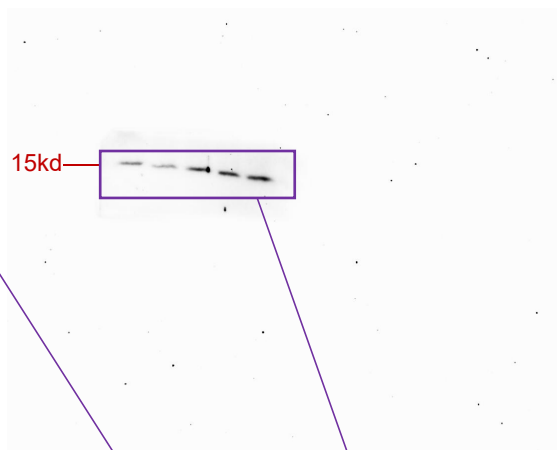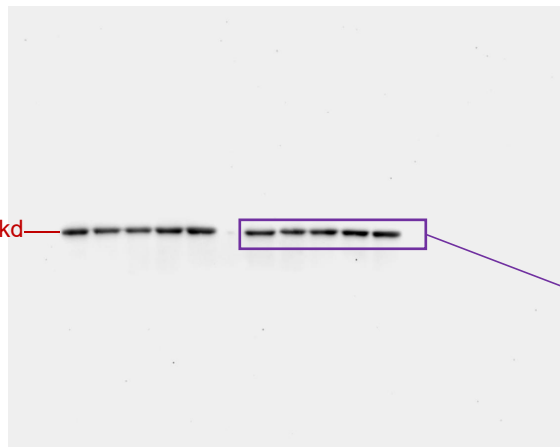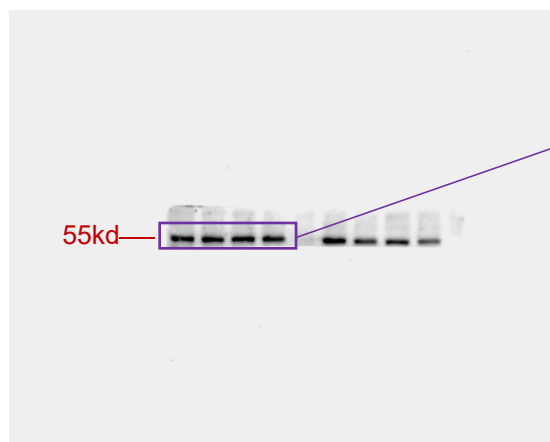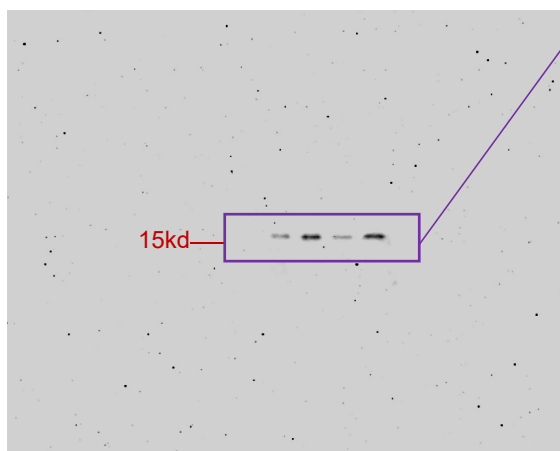

**A**

**Figure S1**

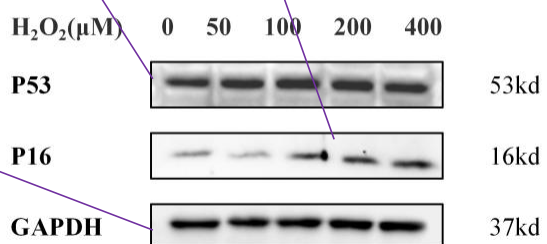

**C**

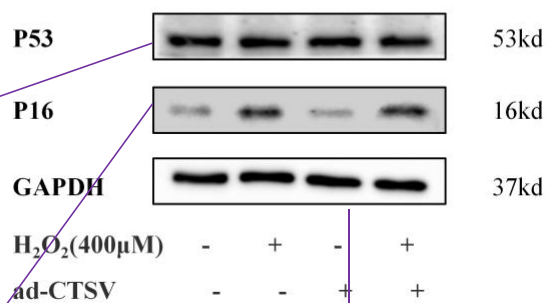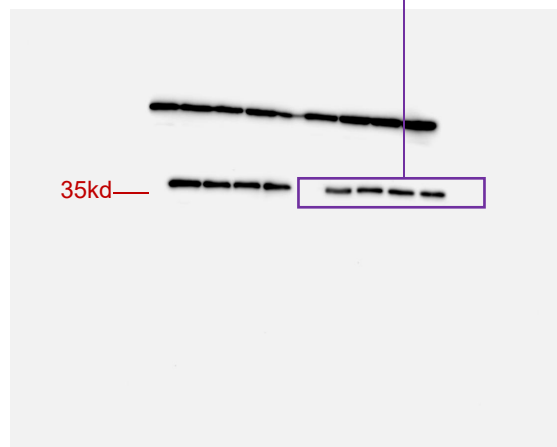



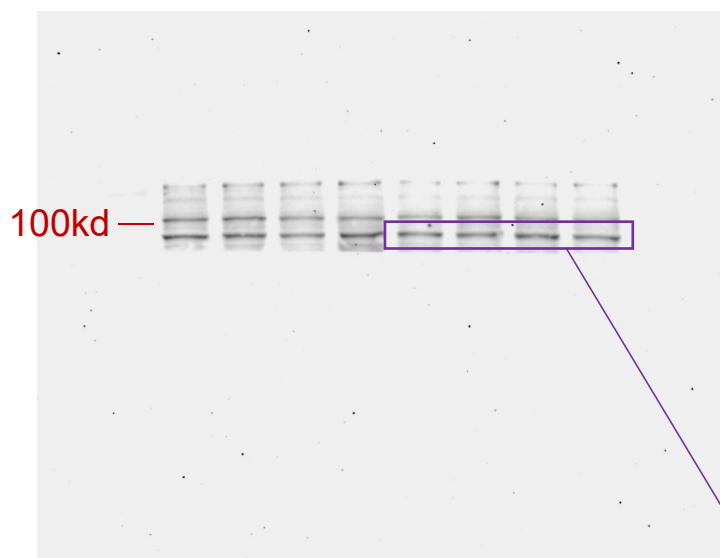

**Figure S3**

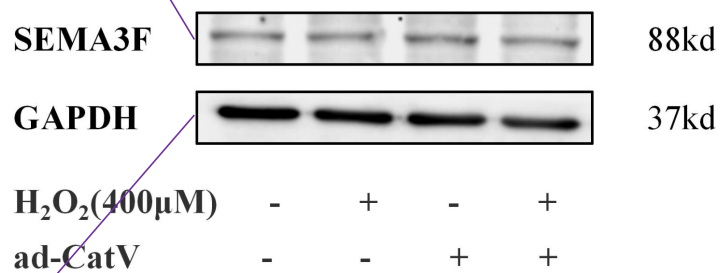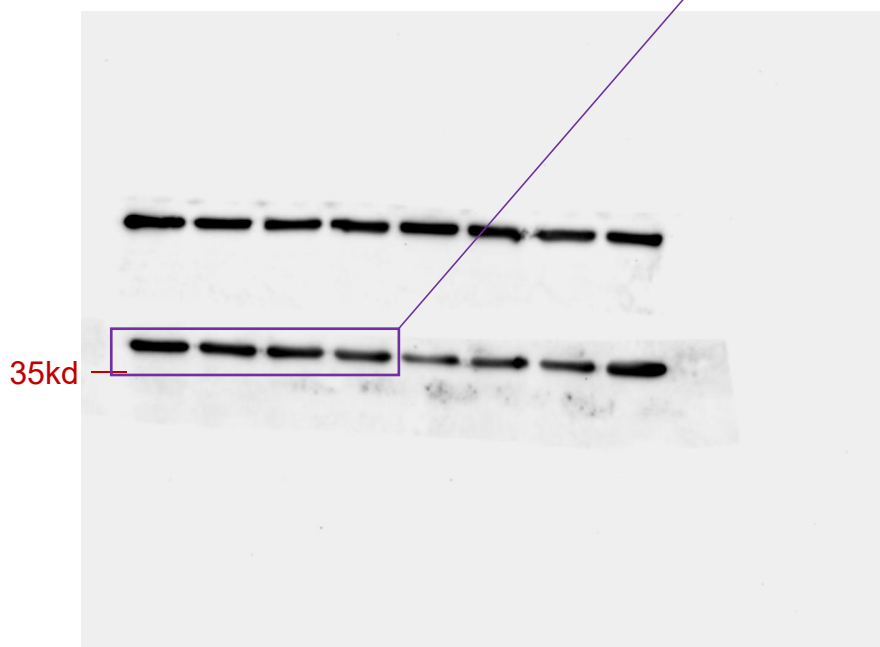

Supplement: s1 [file s1]
